# Supplementary material for: N6-methyladenosine (m6A) modification and its clinical relevance in cognitive dysfunctions
Source: Aging (Albany NY). 2021 Aug 30;13(16):20716–37. doi: 10.18632/aging.203457 (PMC8436914; doi:10.18632/aging.203457)
Supplement: Additional file 1 [file aging-13-203457-s003.xlsx]

## Sheet: GSEA_AD vs CTL
Term	ES	NES	NP	FDR	FWER	ABS
KEGG_NUCLEOTIDE_EXCISION_REPAIR	-0.6806	-1.8169	0	0.0315	0.046	1.8169
KEGG_MISMATCH_REPAIR	-0.689	-1.7618	0	0.0415	0.107	1.7618
KEGG_BASAL_TRANSCRIPTION_FACTORS	-0.6776	-1.7004	0.002	0.0634	0.21	1.7004
KEGG_HUNTINGTONS_DISEASE	-0.6748	-1.6735	0	0.0679	0.266	1.6735
KEGG_CARDIAC_MUSCLE_CONTRACTION	-0.7144	-1.668	0	0.0562	0.275	1.668
KEGG_DNA_REPLICATION	-0.6245	-1.664	0.0118	0.0487	0.285	1.664
KEGG_ALZHEIMERS_DISEASE	-0.6763	-1.6572	0	0.0448	0.303	1.6572
KEGG_ALANINE_ASPARTATE_AND_GLUTAMATE_METABOLISM	-0.577	-1.625	0.0122	0.059	0.403	1.625
KEGG_PROTEASOME	-0.7611	-1.6145	0.004	0.0584	0.43	1.6145
KEGG_PROPANOATE_METABOLISM	-0.6547	-1.5842	0.004	0.0735	0.524	1.5842
KEGG_PARKINSONS_DISEASE	-0.7883	-1.5659	0	0.0828	0.583	1.5659
KEGG_HOMOLOGOUS_RECOMBINATION	-0.5758	-1.5531	0.0156	0.088	0.627	1.5531
KEGG_TERPENOID_BACKBONE_BIOSYNTHESIS	-0.7169	-1.5477	0.0094	0.0852	0.643	1.5477
KEGG_BUTANOATE_METABOLISM	-0.553	-1.5459	0.0193	0.0807	0.648	1.5459
KEGG_PYRUVATE_METABOLISM	-0.6026	-1.5458	0.0077	0.0753	0.648	1.5458
KEGG_OXIDATIVE_PHOSPHORYLATION	-0.7762	-1.542	0.0019	0.0733	0.659	1.542
KEGG_SPLICEOSOME	-0.5956	-1.5298	0.004	0.0778	0.685	1.5298
KEGG_RNA_DEGRADATION	-0.6207	-1.5041	0.0078	0.0942	0.74	1.5041
KEGG_RNA_POLYMERASE	-0.5801	-1.4974	0.0398	0.095	0.749	1.4974
KEGG_PROTEIN_EXPORT	-0.7616	-1.4569	0.0252	0.1282	0.839	1.4569
KEGG_RIBOSOME	-0.903	-1.4523	0	0.1269	0.853	1.4523
KEGG_CELL_CYCLE	-0.4441	-1.4179	0.0496	0.1599	0.903	1.4179
KEGG_PEROXISOME	-0.4125	-1.3819	0.0291	0.1899	0.943	1.3819
KEGG_ASTHMA	-0.7395	-1.3689	0.0467	0.1924	0.954	1.3689
KEGG_CYTOKINE_CYTOKINE_RECEPTOR_INTERACTION	0.4065	1.3934	0.039	0.1546	0.943	1.3934
KEGG_DRUG_METABOLISM_OTHER_ENZYMES	0.4841	1.4344	0.0491	0.1317	0.895	1.4344
KEGG_FOCAL_ADHESION	0.4863	1.4349	0.0495	0.1342	0.892	1.4349
KEGG_RIG_I_LIKE_RECEPTOR_SIGNALING_PATHWAY	0.535	1.4402	0.0487	0.1416	0.886	1.4402
KEGG_PHOSPHATIDYLINOSITOL_SIGNALING_SYSTEM	0.5098	1.4409	0.0482	0.1443	0.884	1.4409
KEGG_ACUTE_MYELOID_LEUKEMIA	0.5756	1.4484	0.0414	0.1429	0.874	1.4484
KEGG_REGULATION_OF_ACTIN_CYTOSKELETON	0.5471	1.4584	0.0421	0.1349	0.856	1.4584
KEGG_BLADDER_CANCER	0.5838	1.4606	0.0302	0.1362	0.853	1.4606
KEGG_ADIPOCYTOKINE_SIGNALING_PATHWAY	0.5236	1.4615	0.0387	0.139	0.853	1.4615
KEGG_RETINOL_METABOLISM	0.4422	1.4775	0.0499	0.1251	0.827	1.4775
KEGG_HYPERTROPHIC_CARDIOMYOPATHY_HCM	0.4755	1.4833	0.049	0.1215	0.812	1.4833
KEGG_SELENOAMINO_ACID_METABOLISM	0.5425	1.4841	0.0475	0.1248	0.811	1.4841
KEGG_SULFUR_METABOLISM	0.726	1.4892	0.0445	0.1231	0.805	1.4892
KEGG_INSULIN_SIGNALING_PATHWAY	0.4817	1.491	0.0211	0.1338	0.804	1.491
KEGG_TIGHT_JUNCTION	0.5008	1.4937	0.0338	0.1357	0.793	1.4937
KEGG_LONG_TERM_DEPRESSION	0.5228	1.4939	0.0335	0.1407	0.792	1.4939
KEGG_STARCH_AND_SUCROSE_METABOLISM	0.559	1.5074	0.0368	0.1275	0.745	1.5074
KEGG_ALDOSTERONE_REGULATED_SODIUM_REABSORPTION	0.5782	1.5425	0.0205	0.0921	0.634	1.5425
KEGG_COMPLEMENT_AND_COAGULATION_CASCADES	0.6056	1.5659	0.0243	0.0763	0.566	1.5659
KEGG_MELANOGENESIS	0.4791	1.5682	0.0229	0.0781	0.562	1.5682
KEGG_ADHERENS_JUNCTION	0.6041	1.5738	0.0243	0.0758	0.538	1.5738
KEGG_VEGF_SIGNALING_PATHWAY	0.5552	1.575	0.0208	0.0787	0.534	1.575
KEGG_FRUCTOSE_AND_MANNOSE_METABOLISM	0.6523	1.5957	0.004	0.0664	0.478	1.5957
KEGG_ARRHYTHMOGENIC_RIGHT_VENTRICULAR_CARDIOMYOPATHY_ARVC	0.5824	1.5958	0.0078	0.07	0.478	1.5958
KEGG_LYSOSOME	0.6331	1.6003	0.004	0.0697	0.458	1.6003
KEGG_JAK_STAT_SIGNALING_PATHWAY	0.5704	1.6031	0.0057	0.0713	0.45	1.6031
KEGG_GAP_JUNCTION	0.5895	1.6311	0.0038	0.0535	0.361	1.6311
KEGG_GNRH_SIGNALING_PATHWAY	0.5388	1.6416	0.0078	0.0505	0.339	1.6416
KEGG_GALACTOSE_METABOLISM	0.6521	1.6476	0.0077	0.0513	0.328	1.6476
KEGG_GLYCEROPHOSPHOLIPID_METABOLISM	0.5588	1.654	0.0039	0.0502	0.309	1.654
KEGG_HEDGEHOG_SIGNALING_PATHWAY	0.438	1.673	0.0057	0.0424	0.25	1.673
KEGG_CALCIUM_SIGNALING_PATHWAY	0.4504	1.6813	0	0.0419	0.233	1.6813
KEGG_MAPK_SIGNALING_PATHWAY	0.5289	1.6817	0.0019	0.0462	0.231	1.6817
KEGG_DILATED_CARDIOMYOPATHY	0.5687	1.715	0	0.0351	0.174	1.715
KEGG_ABC_TRANSPORTERS	0.5162	1.74	0.0056	0.0268	0.128	1.74
KEGG_GLYCOSAMINOGLYCAN_BIOSYNTHESIS_HEPARAN_SULFATE	0.6771	1.7519	0.0019	0.0273	0.113	1.7519
KEGG_GLYCEROLIPID_METABOLISM	0.6191	1.7583	0.0038	0.0294	0.103	1.7583
KEGG_GLYCOSAMINOGLYCAN_DEGRADATION	0.7426	1.7627	0.0019	0.0351	0.099	1.7627
KEGG_TYPE_II_DIABETES_MELLITUS	0.6682	1.7778	0.0039	0.0383	0.084	1.7778
KEGG_SPHINGOLIPID_METABOLISM	0.7121	1.9032	0	0.0071	0.011	1.9032
KEGG_TASTE_TRANSDUCTION	0.6142	2.0099	0.0021	0.0029	0.003	2.0099

## Sheet: GSEA_MCI vs CTL
Term	ES	NES	NP	FDR	FWER	ABS
KEGG_TASTE_TRANSDUCTION	-0.6222	-2.0476	0	0.0019	0.001	2.0476
KEGG_DILATED_CARDIOMYOPATHY	-0.5917	-1.7966	0.002	0.0444	0.062	1.7966
KEGG_HYPERTROPHIC_CARDIOMYOPATHY_HCM	-0.5169	-1.6443	0.0157	0.225	0.34	1.6443
KEGG_SPHINGOLIPID_METABOLISM	-0.5922	-1.6308	0.0118	0.2037	0.386	1.6308
KEGG_GLYCEROPHOSPHOLIPID_METABOLISM	-0.5147	-1.5632	0.0173	0.2224	0.603	1.5632
KEGG_CALCIUM_SIGNALING_PATHWAY	-0.4265	-1.5545	0.0041	0.2154	0.629	1.5545
KEGG_GLYCOSAMINOGLYCAN_DEGRADATION	-0.6533	-1.5518	0.0372	0.1997	0.641	1.5518
KEGG_UBIQUITIN_MEDIATED_PROTEOLYSIS	0.4514	1.38	0.0464	0.2125	0.954	1.38
KEGG_OOCYTE_MEIOSIS	0.4291	1.4122	0.0429	0.1957	0.923	1.4122
KEGG_SPLICEOSOME	0.5397	1.4148	0.0402	0.2033	0.919	1.4148
KEGG_RIBOSOME	0.8597	1.4261	0.0139	0.1974	0.902	1.4261
KEGG_OXIDATIVE_PHOSPHORYLATION	0.7069	1.431	0.0221	0.2177	0.895	1.431
KEGG_PARKINSONS_DISEASE	0.7168	1.4471	0.0041	0.2235	0.87	1.4471
KEGG_PROTEASOME	0.6948	1.4638	0.0424	0.2126	0.847	1.4638
KEGG_PYRIMIDINE_METABOLISM	0.4291	1.4723	0.0133	0.2173	0.832	1.4723
KEGG_PROTEIN_EXPORT	0.7692	1.4761	0.0228	0.2345	0.822	1.4761
KEGG_PYRUVATE_METABOLISM	0.5685	1.5062	0.0273	0.2006	0.756	1.5062
KEGG_CARDIAC_MUSCLE_CONTRACTION	0.6536	1.5146	0.0143	0.2142	0.737	1.5146
KEGG_ALZHEIMERS_DISEASE	0.6233	1.5241	0	0.229	0.719	1.5241
KEGG_MISMATCH_REPAIR	0.6223	1.5623	0.0186	0.2337	0.593	1.5623
KEGG_PROPANOATE_METABOLISM	0.6312	1.5843	0.0099	0.2461	0.528	1.5843

## Sheet: GSEA_AD vs MCI
Term	ES	NES	NP	FDR	FWER	ABS
KEGG_TASTE_TRANSDUCTION	-0.5309	-1.7983	0.0039	0.0774	0.069	1.7983
