# Supplementary material for: N6-methyladenosine (m6A) modification and its clinical relevance in cognitive dysfunctions
Source: publisher site journal article supplement (doi:10.18632/aging.203457), 2021-08-30
Supplement: Supplementary file [file aging-v13i16-203457-supplementary-material-SD2.pdf]

## SUPPLEMENTARY TABLES

**Supplementary Table 1. Age stratification in specific cognitive function groups.**

| Groups | Total<br>n (%) | ≤70 years old<br>n (%) | 71-79 years old<br>n (%) | ≥80 years old<br>n (%) | $\chi^2$ Test |         |
|--------|----------------|------------------------|--------------------------|------------------------|---------------|---------|
|        |                |                        |                          |                        | $\chi^2$      | P Value |
| CTL    | 238 (33.5)     | 68 (43.1)              | 127 (37.1)               | 43 (20.5)*             | 26.2          | <0.001  |
| MCI    | 189 (26.6)     | 37 (23.4)              | 90 (26.2)                | 62 (29.5)              |               |         |
| AD     | 284 (39.9)     | 53 (33.5)              | 126 (36.7)               | 105 (50.0)*            |               |         |
| Total  | 711            | 158 (22.2)             | 343 (48.2)               | 210 (29.5)             |               |         |

\*P < 0.05 compared to other age groups.

**Supplementary Table 2-1. Prediction of the prevalence from CTL to MCI.**

|          | B      | SE     | P      | OR    | 95% CI         |
|----------|--------|--------|--------|-------|----------------|
| Age      | 0.054  | 0.017  | 0.001  | 1.056 | (1.022, 1.091) |
| WTAP     | -1.699 | 0.439  | <0.001 | 0.183 | (0.077, 0.433) |
| ZCCHC4   | -2.814 | 1.523  | 0.065  | 0.060 | (0.003, 1.186) |
| HNRNPC   | -2.234 | 0.658  | 0.001  | 0.107 | (0.029, 0.389) |
| Constant | 47.361 | 11.777 | <0.001 |       |                |

**Supplementary Table 2-2. Prediction of the prevalence from CTL to AD.**

|          | B      | SE     | P      | OR    | 95% CI          |
|----------|--------|--------|--------|-------|-----------------|
| Age      | 0.054  | 0.015  | <0.001 | 1.055 | (1.025, 1.087)  |
| METTL3   | 1.527  | 0.699  | 0.029  | 4.603 | (1.170, 18.118) |
| METTL14  | -2.079 | 1.067  | 0.051  | 0.125 | (0.015, 1.013)  |
| WTAP     | -1.198 | 0.494  | 0.015  | 0.302 | (0.115, 0.795)  |
| YTHDF3   | 2.084  | 0.698  | 0.003  | 8.033 | (2.047, 31.523) |
| YTHDC1   | -1.173 | 0.493  | 0.017  | 0.309 | (0.118, 0.813)  |
| IGF2BP2  | -0.465 | 0.174  | 0.007  | 0.628 | (0.447, 0.883)  |
| HNRNPC   | -1.432 | 0.599  | 0.017  | 0.239 | (0.074, 0.772)  |
| FTO      | -2.409 | 0.949  | 0.011  | 0.090 | (0.014, 0.578)  |
| ALKBH5   | 1.625  | 0.550  | 0.003  | 5.079 | (1.728, 14.931) |
| Constant | 19.863 | 13.301 | 0.135  |       |                 |

**Supplementary Table 2-3. Prediction of the prevalence from MCI to AD.**

|          | B      | SE    | P     | OR    | 95% CI          |
|----------|--------|-------|-------|-------|-----------------|
| Gender   | 0.399  | 0.202 | 0.048 | 1.490 | (1.003, 2.213)  |
| METTL3   | 1.944  | 0.698 | 0.005 | 6.984 | (1.778, 27.432) |
| WTAP     | 0.964  | 0.496 | 0.052 | 2.621 | (0.991, 6.935)  |
| RBM15    | 1.473  | 0.623 | 0.018 | 4.361 | (1.287, 14.783) |
| YTHDF1   | -2.235 | 0.796 | 0.005 | 0.107 | (0.022, 0.50)   |
| YTHDC1   | -0.957 | 0.489 | 0.051 | 0.384 | (0.147, 1.002)  |
| LRPPRC   | -1.945 | 0.766 | 0.011 | 0.143 | (0.032, 0.642)  |
| Constant | 7.798  | 9.232 | 0.398 |       |                 |
